## Corrigendum

**Mouse amnionless, which is required for primitive streak assembly, mediates cell-surface localization and endocytic function of cubulin on visceral endoderm and kidney proximal tubules**

Sharon Strobe, Roberta Rivi, Thomas Metzger, Katia Manova and Elizabeth Lacy *Development* **131**, 4787-4795.

The reference Fyfe et al. (2004) was listed incorrectly in the References.

The correct reference is:

**Fyfe, J. C., Madsen, M., Hojrup, P., Christensen, E. I., Tanner, S. M., de la Chapelle, A., He, Q. and Moestrup, S. K.** (2004). The functional cobalamin (vitamin B12)-intrinsic factor receptor is a novel complex of cubilin and amnionless. *Blood* **103**, 1573-1579.

The authors apologise to readers for this mistake.
